# Supplementary material for: Single-Cell Data Analysis Using MMD Variational Autoencoder for a More Informative Latent Representation
Source: bioRxiv or medRxiv preprint supplement (doi:10.1101/613414), 2019-06-23
Supplement: Supplementary file [file media-1.pdf]

# Supplementary Information

Chao Zhang<sup>1,\*</sup>

<sup>1</sup>Vrije Universiteit Amsterdam, Computer Science, Amsterdam, 1081 HV, the Netherlands  
\*c.zhang@vu.nl

## ABSTRACT

Variational Autoencoder (VAE) is a generative model from the computer vision community; it learns a latent representation of the images and generates new images in an unsupervised way. Recently, Vanilla VAE has been applied to analyse single-cell datasets, in the hope of harnessing the representation power of latent space to evade the “curse of dimensionality” of the original dataset. However, some research points out that Vanilla VAE is suffering from the issue of the less informative latent space, which raises a question concerning the reliability of Vanilla VAE latent space in representing the high-dimensional single-cell datasets. Therefore a study is set up to examine this issue from the perspective of bioinformatics. This paper confirms the issue of Vanilla VAE by comparing it to MMD-VAE, a variant of VAE which has overcome this issue, across a series of mass cytometry and single-cell RNAseq datasets. The result shows MMD-VAE is superior to Vanilla VAE in retaining the information not only in the latent space but also the reconstruction space, which suggests that MMD-VAE be a better option for single-cell data analysis.

## Supplementary Table

### Supplementary table S1

| Dataset | F2-Score | MCC   |
|---------|----------|-------|
| AML     | 0.970    | 0.972 |
| PAN     | 0.990    | 0.991 |
| SN      | 0.794    | 0.793 |
| RBN     | 0.982    | 0.983 |

**Table 1.** The accuracy of the classifier applied to the original datasets, two metrics are used: F2-Score and MCC.

### Supplementary Table S2

| vanilla VAE/MMD-VAE |                           |                |                             |               |                     |            |
|---------------------|---------------------------|----------------|-----------------------------|---------------|---------------------|------------|
| Dataset             | dimension of latent space | training steps | en/decoder structure        | learning rate | Activation Function | batch size |
| AML                 | 3                         | 10,000         | [24, 16, 8],<br>[8, 16, 24] | 1e-3          | Relu                | 256        |
| PAN                 | 3                         | 12,000         | [36, 18, 9],<br>[9, 18, 36] |               |                     |            |
| SN                  | 10                        | 10,000         | [40, 24, 8],<br>[8, 24, 40] |               |                     |            |
| RBN                 | 3                         | 10,000         | [24, 12, 6],<br>[6, 12, 24] |               |                     |            |

**Table 2.** The parameters of variational autoencoder; parameters are training over Vanilla VAE per dataset.

### Supplementary Table S3

### Supplement figure

### Supplementary Figure S1

| Neural Network Classifier |                |              |         |       |               |                   |                     |            |
|---------------------------|----------------|--------------|---------|-------|---------------|-------------------|---------------------|------------|
| Dataset                   | VAE Space      | structure    | dropout | epoch | learning rate | l2 regularization | Activation Function | batch size |
| AML                       | Recons/Latent  | [12,6]       | 0       | 20    | 0.001         | 0                 | Relu                | 128        |
| PAN                       | Reconstruction | [36,18,9]    | 0       | 20    | 0.001         | 0.01              |                     |            |
|                           | Latent         | [36,24,12,6] |         |       | 0.1           | 0                 |                     |            |
| SN                        | Reconstruction | [40,15]      | 0.1     | 500   | 0.02          | 0.01              |                     |            |
|                           | Latent         | [12,6,3]     | 0       | 1000  |               | 0                 |                     |            |
| RBN                       | Reconstruction | [20,10,5]    | 0       | 100   | 0.001         | 0                 |                     |            |
|                           | Latent         | [12,6,3]     |         | 200   | 0.02          |                   |                     |            |

**Table 3.** The parameters of neural network classifier for the original space, latent space and reconstruction space per dataset, parameters are trained over the output of Vanilla VAE per space per dataset.

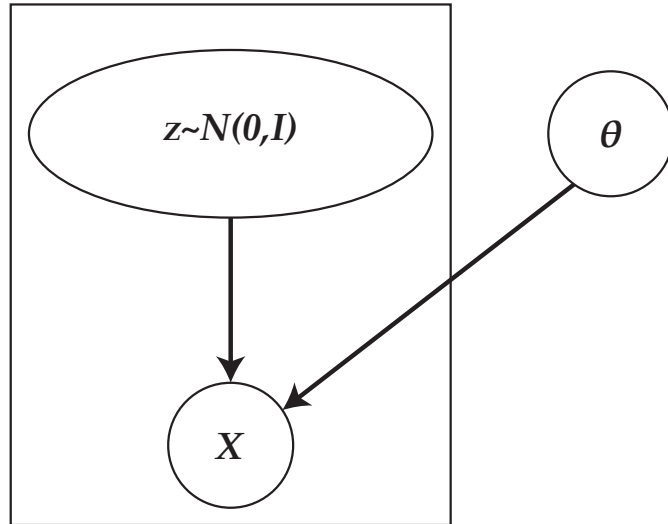

**Figure 1.** A graphical model representing Variational Autoencoder (VAE)

## Data availability

Data and code that contributes to the reproducibility of the results in this manuscript, as well as other technical details, are available at: <https://research-project.gitlab.io/mmd-vae/>
